# Supplementary material for: Elucidating the nature and role of copper species in catalytic carbonylation of methanol to methyl acetate over copper/titania–silica mixed oxides
Source: Royal Society of Chemistry journal article supplement (doi:10.1039/c7cy00719a), 2017-01-01
Supplement: c7cy00719a1.pdf [file c7cy00719a1.pdf]

## Electronic Supplementary Information

### Elucidating the nature and role of copper species in catalytic carbonylation of methanol to methyl acetate over copper/Titania-silica mixed oxides

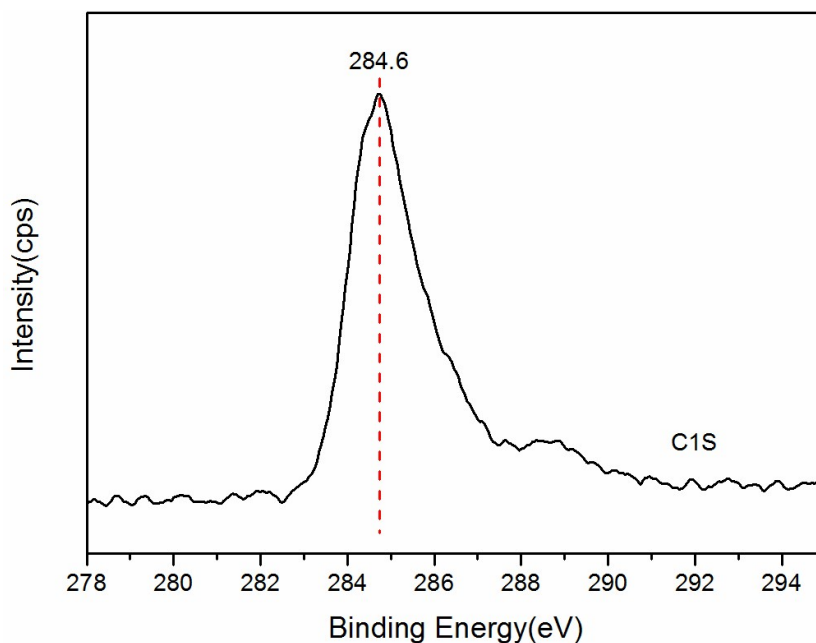

Fig.S1 XPS spectrum of the adventitious carbon

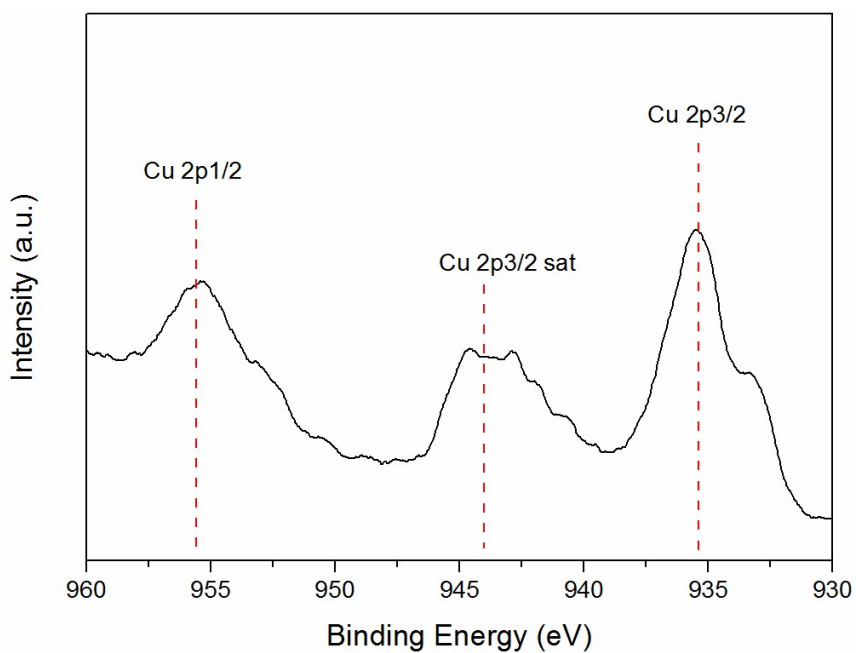

Fig.S2 Cu<sub>2</sub>p XPS spectrum of the 10.24 Cu/TS catalyst before reduction

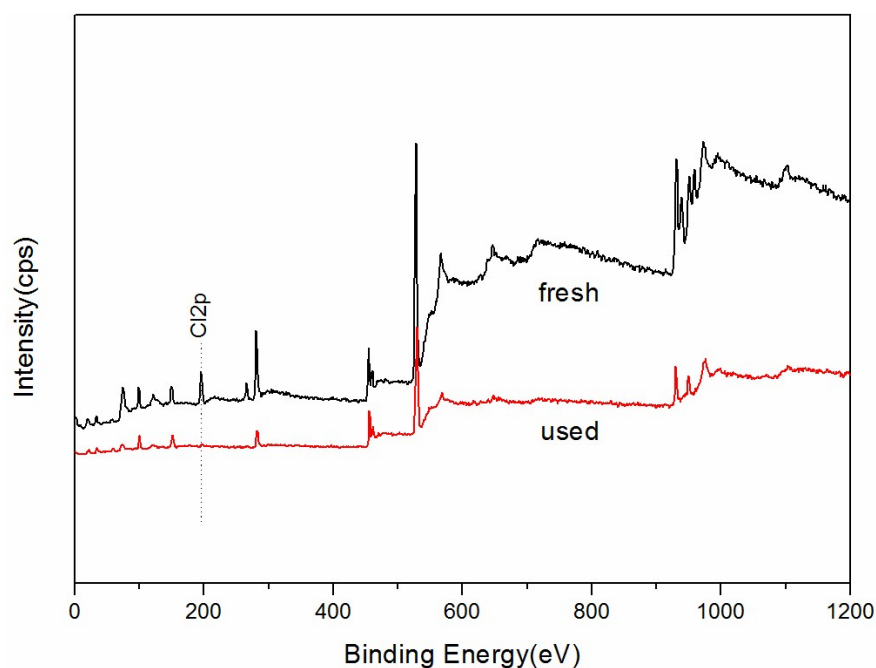

Fig.S3 The loss of the Cl in the reaction (Reaction condition: same as above; Fresh: the catalyst before carbonylation reaction and after 4 h of pretreatment in the CO under 503 K; Used: the catalyst after 24 h of carbonylation reaction)

Table S1 Average chloride content of 10.24 Cu/TS catalyst during the carbonylation of methanol by means of EDXRF elemental analysis

|                                              | Fresh <sup>a</sup> | Reaction time (h) |        |        |        |
|----------------------------------------------|--------------------|-------------------|--------|--------|--------|
|                                              |                    | 6                 | 12     | 18     | 24     |
| Chloride content (wt%)                       | 2.080              | 1.156             | 0.757  | 0.532  | 0.264  |
| Atomic ratio Cl/Cu                           | 0.378              | 0.210             | 0.136  | 0.099  | 0.050  |
| X <sub>Methanol</sub> (%)                    | ---                | 23.413            | 28.311 | 32.263 | 30.015 |
| STY <sub>MA</sub> (mol/h.Kg <sub>cat</sub> ) | ---                | 1.241             | 1.506  | 1.804  | 1.779  |

<sup>a</sup>the catalyst after drying

Reaction condition: same as above

Furthermore, to further rule out the effect of chlorine species, we also prepared another catalyst using Cu(NO<sub>3</sub>)<sub>2</sub> as precursor (marked as 10Cu/TS-N). The catalytic performance showed that, through suitable pretreatment, the 10Cu/TS-N catalyst can exhibit similar catalytic activity to the 10.24Cu/TS (CuCl<sub>2</sub> precursor) catalyst in MA synthesis, which supports our above deduction (see Table S2).

Table S2 Catalytic performance for methanol carbonylation on the different catalysts

| Catalyst   | X <sub>Methanol</sub><br>(%) | S <sub>i</sub> (mol %) |        |        | STY <sub>MA</sub> (mol/h.Kg <sub>cat</sub> ) |
|------------|------------------------------|------------------------|--------|--------|----------------------------------------------|
|            |                              | MA                     | MF     | DME    |                                              |
| 10.24Cu/TS | 29.215                       | 50.133                 | 22.992 | 26.875 | 1.770                                        |
| 10Cu/TS-N  | 22.837                       | 53.016                 | 17.425 | 29.559 | 1.463                                        |

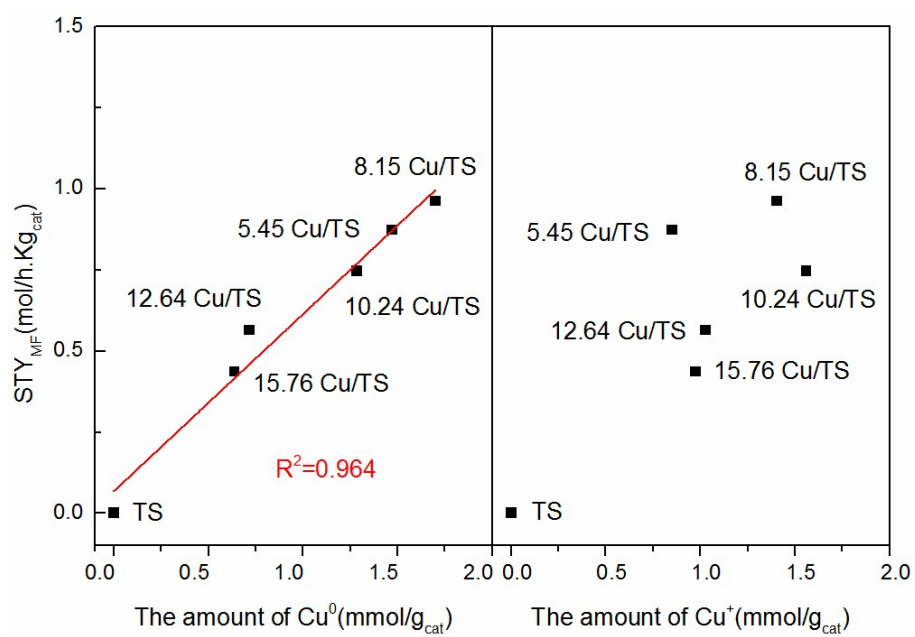

Fig.S4 The correlation of  $STY_{MF}$  with  $Cu^0$  and  $Cu^+$  for the reduced catalysts
